# Supplementary material for: Train at home, but not alone: a randomised controlled multicentre trial assessing the effects of live-streamed tele-exercise during COVID-19-related lockdowns
Source: HighWire-hosted journal article supplement (doi:10.1136/bjsports-2021-104994), 2022-02-15
Supplement: bjsports-2021-104994supp001_data_supplement.pdf [file bjsports-2021-104994supp001_data_supplement.pdf]

|         | Monday                                   | Tuesday                           | Wednesday                     | Thursday                     | Friday                                   | Saturday                           | Sunday                                     |
|---------|------------------------------------------|-----------------------------------|-------------------------------|------------------------------|------------------------------------------|------------------------------------|--------------------------------------------|
| 8:00 AM |                                          | Good Morning Yoga (Marie)         |                               |                              |                                          |                                    |                                            |
| 8:30 AM | Leg Day: Lower Limb Resistance (Leander) | Balance, Stability & Core (David) | Lower Back Fitness (Leander)  | Core Training (Leander)      | Leg Day: Lower Limb Mobility (Leander)   | Lower Back Fitness (Leander)       | Active Relaxation to start the Day (David) |
| 9:30 AM | Stretch & Mobility (Falk)                |                                   | Stretch & Relax (Leander)     | Stretch & Mobility (Leander) | Leg Day: Lower Limb Resistance (Leander) | Stretch & Mobility (Falk)          | Resistance: Abs, Back, Shoulders (David)   |
| 6:00 PM | The 1-Minute-Workout (David)             | Abs, Legs, Glutes (Falk)          | Coordination (Leander)        | Abs, Legs, Glutes (David)    | Brain-Jogging (David)                    | Balance, Stability & Core (Falk)   | Whole-body Circuit (Falk)                  |
| 7:00 PM | Abs and Core (David)                     | HIIT: Intensive Endurance (Falk)  | Stability Challenge (Leander) | Relaxation (David)           | The 1-Minuten-Workout (David)            | Moderate Endurance Training (Falk) | Stretch & Mobility (Falk)                  |

strength
  relaxation & mobility
  coordination
  endurance
