# Supplementary material for: Train at home, but not alone: a randomised controlled multicentre trial assessing the effects of live-streamed tele-exercise during COVID-19-related lockdowns
Source: HighWire-hosted journal article supplement (doi:10.1136/bjsports-2021-104994), 2022-02-15
Supplement: bjsports-2021-104994supp004_data_supplement.pdf [file bjsports-2021-104994supp004_data_supplement.pdf]

**Suppl. Tab. 1.** Characteristics of the digital home exercise intervention per study centre

| Centre            | Training days   | Workouts per week [n] | Workout duration [min] | Workout types                                                                                            |
|-------------------|-----------------|-----------------------|------------------------|----------------------------------------------------------------------------------------------------------|
| Germany/Austria   | Monday-Sunday   | 28                    | 30-45                  | - Strength<br>- Flexibility<br>- Balance & Stability<br>- Coordination<br>- Endurance<br>- Core training |
| Brazil            | Monday-Sunday   | 24                    | 30-45                  | - Strength<br>- Flexibility<br>- Balance & Stability<br>- Coordination<br>- Endurance<br>- Core training |
| Italy             | Monday-Saturday | 12                    | 60                     | - Balance & Flexibility<br>- Strength                                                                    |
| Ireland           | Monday-Friday   | 6                     | 30-45                  | - Flexibility<br>- Strength<br>- Balance                                                                 |
| Spain             | Monday-Friday   | 18                    | 30                     | - Balance<br>- Flexibility<br>- Core training<br>- Strength<br>- Endurance                               |
| South Africa      | Monday-Friday   | 15                    | 30-45                  | - Core training<br>- Flexibility<br>- Endurance<br>- Strength                                            |
| Chile & Argentina | Monday-Sunday   | 28                    | 30-45                  | - Strength<br>- Flexibility<br>- Coordination & Stability<br>- Endurance                                 |

n = number, min = minutes
