# Supplementary figures and images for: Train at home, but not alone: a randomised controlled multicentre trial assessing the effects of live-streamed tele-exercise during COVID-19-related lockdowns
Source: HighWire-hosted journal article supplement (doi:10.1136/bjsports-2021-104994), 2022-02-15

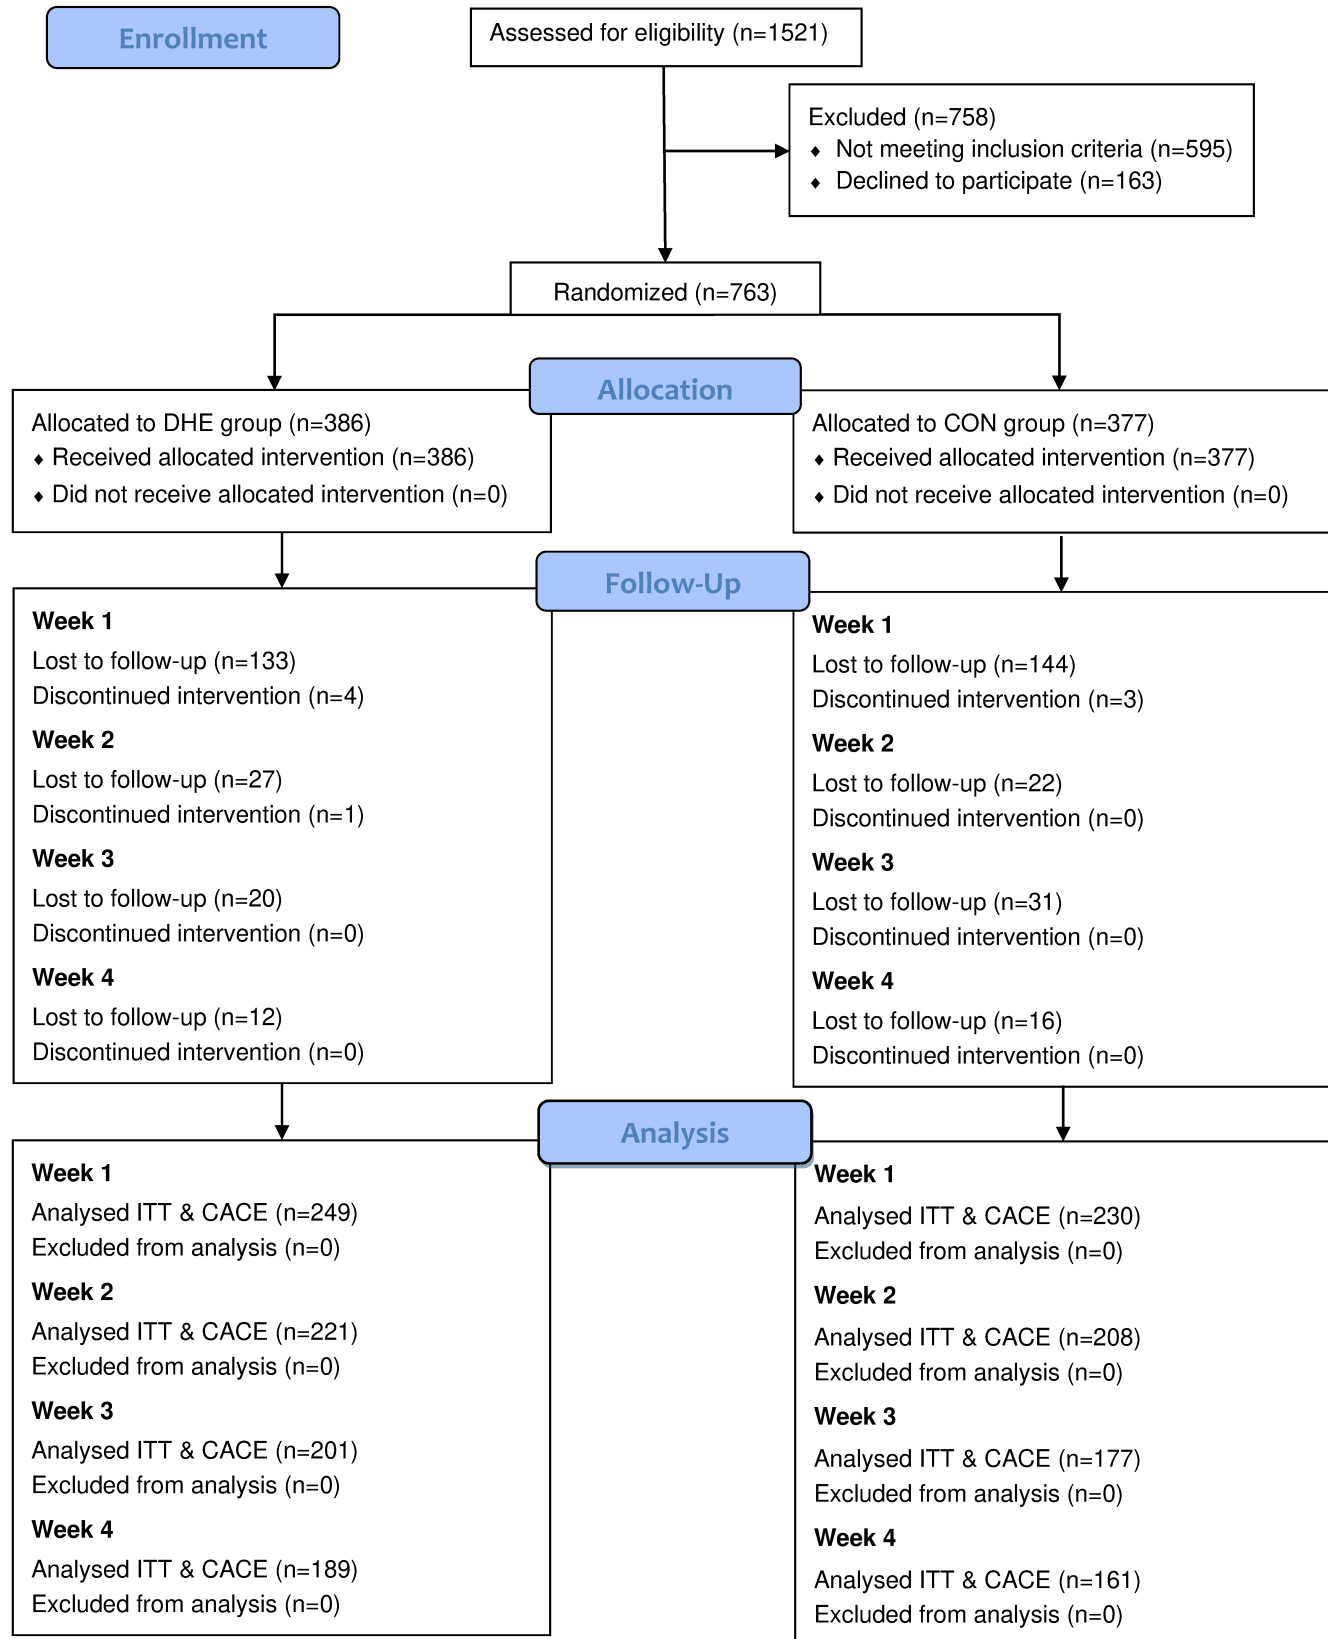

Supplement: bjsports-2021-104994supp003_data_supplement.pdf [file bjsports-2021-104994supp003_data_supplement.pdf]

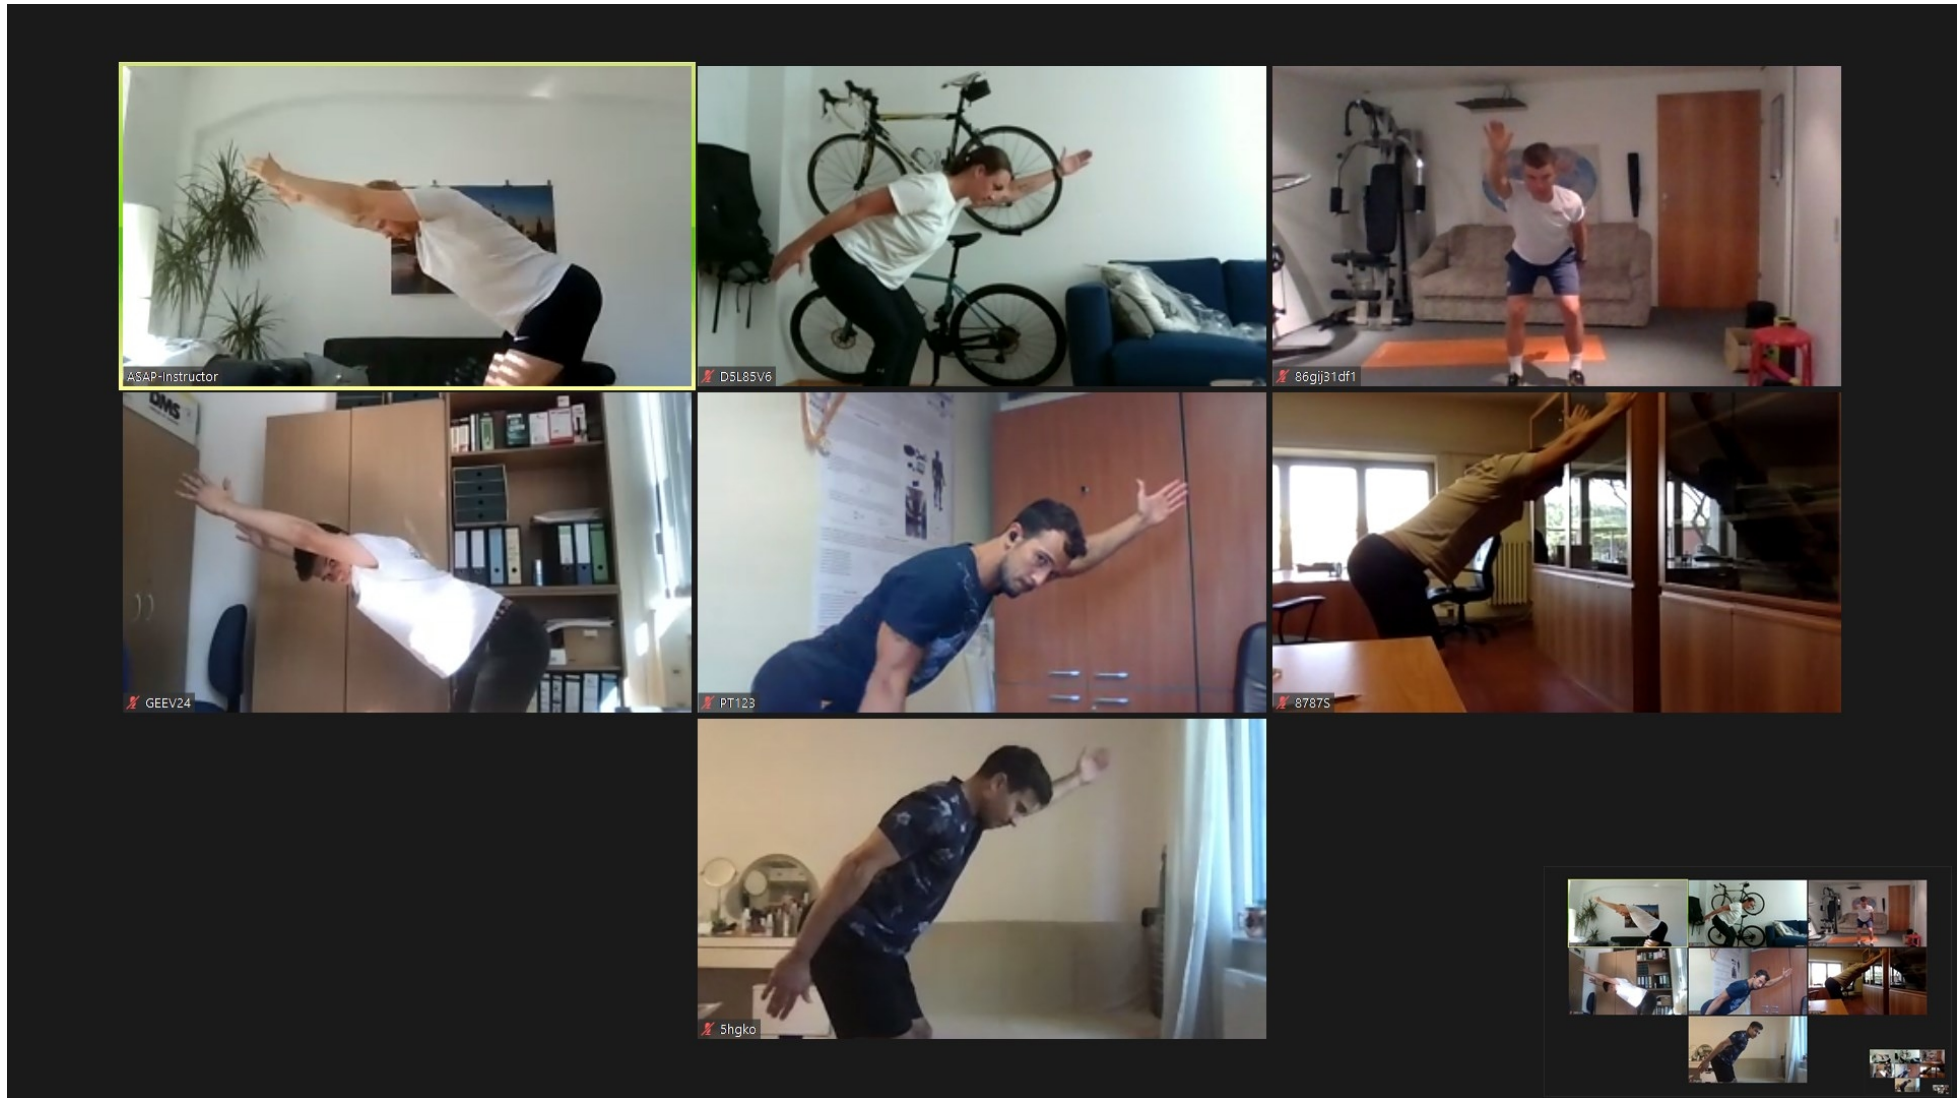

Supplement: bjsports-2021-104994supp002_data_supplement.pdf [file bjsports-2021-104994supp002_data_supplement.pdf]
